# Supplementary material for: Characterization of the Polysialylation Status in Ovaries of the Salmonid Fish Coregonus maraena and the Percid Fish Sander lucioperca
Source: MDPI journal article supplement (doi:10.3390/cells9112391), 2020-10-31
Supplement: s1 [file s1]

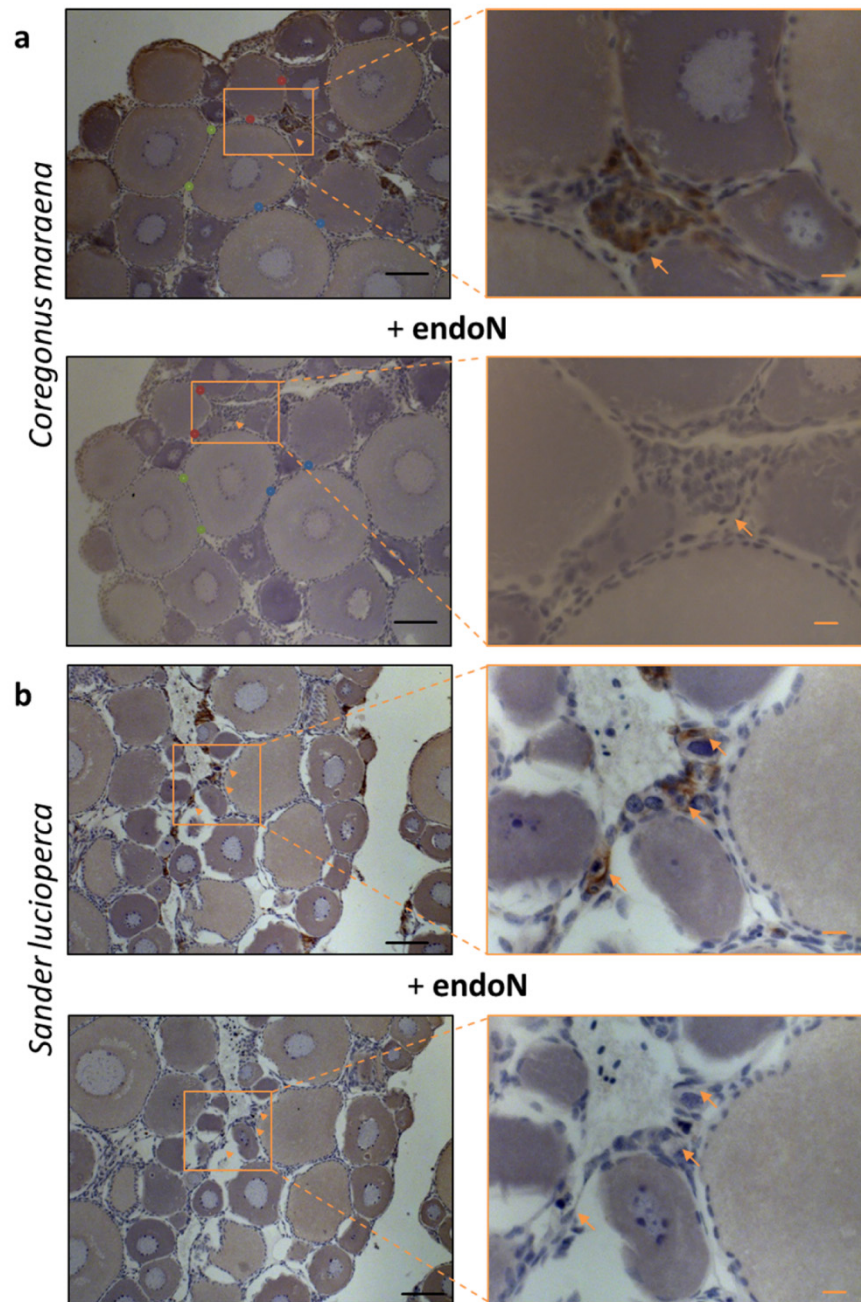

**Supplemental figure 2: Histological analysis of the polysialylation status in ovaries from (a) *C. maraena* and (b) *S. lucioperca*.** To detect polySia, mAb 735 was applied using 3  $\mu$ m tissue sections. For immunohistochemical visualization, an HRP-conjugated secondary antibody was applied. For negative control, polySia was degraded by endoN on the following serial section. Nuclei were stained with hematoxylin. Selected polySia-positive cells are indicated with orange arrows. The colored spots should help to find characteristic areas. Black scale bars: 100  $\mu$ m; orange scale bars: 10  $\mu$ m. The colored boxes approximately indicates the enlarged areas.
